# Supplementary material for: OPA1 Modulates Mitochondrial Ca2+ Uptake Through ER-Mitochondria Coupling
Source: Frontiers journal article supplement (doi:10.3389/fcell.2021.774108), 2022-01-03
Supplement: Data_Sheet_1.PDF [file Data_Sheet_1.PDF]

Supplementary Table 1: Data summary of main findings in the different model systems

|                                             | ER-mito association | CCh [Ca <sup>2+</sup> ] <sub>c</sub> vs mt | SOCE [Ca <sup>2+</sup> ] <sub>c</sub> vs mt |
|---------------------------------------------|---------------------|--------------------------------------------|---------------------------------------------|
| WT                                          | -                   | -                                          | -                                           |
| Opa1 <sup>-/-</sup>                         | Increased           | Leftward shift                             | Rightward shift                             |
| Opa1 <sup>-/-</sup> + OPA1                  | Rescued             | Partial rescue                             | Rescued                                     |
| Patient cells                               |                     |                                            |                                             |
| Control                                     | -                   | -                                          | ND                                          |
| c.870+5g>a                                  | Increased           | Partial leftward Shift                     | ND                                          |
| c.889c>t                                    | Increased           | Partial leftward Shift                     | ND                                          |
| c.2713c>t                                   | Unchanged           | Partial leftward Shift                     | ND                                          |
| c.2818+5g>a                                 | Increased           | ND                                         | ND                                          |
| Mutants rescue (OPA1 KO MEFs background)    |                     |                                            |                                             |
| Opa1 <sup>-/-</sup>                         | Increased           | Leftward shift                             | Rightward shift                             |
| +OPA1 WT                                    | ND                  | Partial rescue                             | Rescued                                     |
| c.870+5g>a                                  | ND                  | Partial rescue                             | Rescued                                     |
| c.889c>t                                    | ND                  | Partial rescue                             | Rescued                                     |
| c.1334g>a                                   | ND                  | Partial rescue                             | Rescued                                     |
| c.2708delTTAG                               | ND                  | Not rescued                                | Rescued                                     |
| c.2713c>t                                   | ND                  | Not rescued                                | Rescued                                     |
| c.2818+5g>a                                 | ND                  | Not rescued                                | Not rescued                                 |
| Mutants overexpression (WT MEFs background) |                     |                                            |                                             |
| WT                                          | -                   | -                                          | -                                           |
| +OPA1 WT                                    | ND                  | Unchanged                                  | ND                                          |
| c.870+5g>a                                  | ND                  | Leftward shift                             | ND                                          |
| c.889c>t                                    | ND                  | Unchanged                                  | ND                                          |
| c.1334g>a                                   | ND                  | Leftward shift                             | ND                                          |
| c.2708delTTAG                               | ND                  | Leftward shift                             | ND                                          |
| c.2713c>t                                   | ND                  | Unchanged                                  | ND                                          |
| c.2818+5g>a                                 | ND                  | Leftward shift                             | ND                                          |

ND: not determined
